# Supplementary material for: Creating Wusetu (“Five-Coloured Clay”): Chronological Changes in Zisha Ware Clay Recipes and the Complexity of Potters’ Technological Choices
Source: Research Square preprint supplement (doi:10.21203/rs.3.rs-6945795/v1), 2025-07-02
Supplement: Supplementary file 1 [file b73e411fe4fb386e474ef3fd.docx]

## Appendix 1: Optical analysis on colour and sherds cross section coarseness of Shushan site samples. Sample colour numbers refer to (based on the Munsell colour chart): 1. red (10R 4/6;10 R:5/6-5/8;2.5YR:5/6-5/8;2.5YR:4/6-4/8); 2. reddish-brown (2.5 YR 4/3.4/4.5/3,5/4; 5YR 5/3,5/4,4/3,4/4); 3. pale brown (7.5YR 7/1; 10YR 7/1, 7/2; 2.5Y 7/1,7/2; 5Y 7/1, 7/2); 4. dark reddish-brown (5YR 3/2,3/3,3/4; 2.5/2; 2.5 YR 3/3,3/4,2.5/4,2.5/4); 5. dark grey (5Y 4/1; 2.5Y 4/1; 10YR 4/1; 7.5YR 4/1; 5YR 4/1); 6. reddish grey (5YR 5/2,4/2). Sample cross-section coarseness numbers (based on Percentage Diagrams for Estimating Composition by Volume) (Compton and Compton 1985, p. 336) refer to: 1. fine clay (1%-5%); 2. fine to medium (5-15%); 3. Medium (15-25%); 4. medium to coarse (25-35%); 5. Coarse (Over 35%). The periods listed are: Late Ming (1522–1644 CE); Early Qing (1644–1735 CE); Mid Qing (1735–1840 CE); Late Qing-Republic (1840–1945 CE)

| **Sample No.** | **Excavation number** | **Sample colour (Optical identification)** | **Sample coarseness (Optical identification)** | **Period** |
| --- | --- | --- | --- | --- |
| 1 | 05BG1(4)_7 | 1 | 5 | Late Ming |
| 2 | 05BG1(4)_80 | 5 | 3 | Late Ming |
| 3 | 05BG1(4)_18 | 4 | 3 | Late Ming |
| 4 | 05BG1(4)_86 | 4 | 5 | Late Ming |
| 5 | 05BG1(4)_84 | 1 | 5 | Late Ming |
| 6 | 05BG1(4)_48 | 1 | 4 | Late Ming |
| 7 | 05BG1(4)_102 | 5 | 2 | Late Ming |
| 8 | 05BG1(4)_8 | 1 | 1 | Late Ming |
| 9 | 06BG1K1(4)_293 | 4 | 2 | Late Ming |
| 10 | 06BG1K1(5)_5 | 5 | 1 | Late Ming |
| 11 | 06BG1K1(5)_10 | 1 | 1 | Late Ming |
| 12 | 06BG1K1(5)_135 | 4 | 1 | Late Ming |
| 13 | 06BG1K1(5)_125 | 1 | 5 | Late Ming |
| 14 | 06BG1K1(5)_29 | 2 | 3 | Late Ming |
| 15 | 06BG1K1(5)_40 | 1 | 1 | Late Ming |
| 16 | 06BG1K1(5)_76 | 4 | 1 | Late Ming |
| 17 | 06BG1K1(5)_130 | 1 | 2 | Late Ming |
| 18 | 05ET1K(25)_5 | 1 | 3 | Early Qing |
| 19 | 05ET1K(18)_30 | 5 | 2 | Early Qing |
| 20 | 05ET1K(18)_22 | 1 | 1 | Early Qing |
| 21 | 05ET1K(17)_11 | 5 | 1 | Early Qing |
| 22 | 05ET1K(26)_15 | 5 | 2 | Early Qing |
| 23 | 05ET1K(25)_7 | 3 | 1 | Early Qing |
| 24 | 05ET1K(23)_7 | 1 | 2 | Early Qing |
| 25 | 05ET1K1(27)_(?) | 1 | 2 | Early Qing |
| 26 | 05ET1K(26)_45 | 3 | 1 | Early Qing |
| 27 | 06ET1K2(12)_23 | 1 | 1 | Early Qing |
| 28 | 06ET1K2(14)_141 | 1 | 2 | Early Qing |
| 29 | 06ET1K2(14)_24 | 5 | 1 | Early Qing |
| 30 | 06ET1K2(14)_114 | 1 | 2 | Early Qing |
| 31 | 06ET1K2(13)_36 | 2 | 2 | Early Qing |
| 32 | 06ET1K(17)_55 | 4 | 3 | Early Qing |
| 33 | 06ET1K2(17)_99 | 1 | 1 | Early Qing |
| 34 | 06ET1K2(17)_30 | 1 | 2 | Early Qing |
| 35 | 06ET1YI(1)_19 | 1 | 3 | Early Qing |
| 36 | 06ET1K2(17)_14 | 2 | 1 | Early Qing |
| 37 | 06ET1K2(13)_10 | 3 | 1 | Early Qing |
| 38 | 06ET1K(17)_41 | 1 | 1 | Early Qing |
| 39 | 06ET1K2(17)_31 | 5 | 2 | Early Qing |
| 40 | 06ET1K2(13)_46 | 2 | 1 | Early Qing |
| 41 | 06ET1K2(12)_33 | 1 | 1 | Early Qing |
| 42 | 06ET1K(12)_18 | 2 | 3 | Early Qing |
| 43 | 06ET1Y1_5 | 4 | 3 | Early Qing |
| 44 | 06ET1K2(6)_312 | 2 | 4 | Early Qing |
| 45 | 06ET1Y1(1)_1 | 1 | 5 | Early Qing |
| 46 | 06ETK(17)_55 | 4 | 3 | Early Qing |
| 47 | 05BG1(3)_134 | 3 | 2 | Mid-Qing |
| 48 | 05BG1(3)_8 | 1 | 1 | Mid-Qing |
| 49 | 05BG1(3)_85 | 1 | 1 | Mid-Qing |
| 50 | 05BG1(3)_30 | 1 | 1 | Mid-Qing |
| 51 | 05BG1(3)_62 | 5 | 2 | Mid-Qing |
| 52 | 05BG1(3)_133 | 1 | 3 | Mid-Qing |
| 53 | 05BG1(3)_98 | 6 | 1 | Mid-Qing |
| 54 | 05BG1(3)_140 | 1 | 1 | Mid-Qing |
| 55 | 05BG1(3)_29 | 4 | 1 | Mid-Qing |
| 56 | 05BG1(3)_105 | 4 | 2 | Mid-Qing |
| 57 | 05BG1(3)_86 | 5 | 1 | Mid-Qing |
| 58 | 05ET1(14)_39 | 4 | 2 | Mid-Qing |
| 59 | 05ET1K(9)_10 | 4 | 1 | Mid-Qing |
| 60 | 05ET1K(7)_59 | 1 | 3 | Mid-Qing |
| 61 | 05ET1K(10)_18 | 2 | 3 | Mid-Qing |
| 62 | 05ET1K(15)_15 | 2 | 2 | Mid-Qing |
| 63 | 05ET1K(12)_9 | 2 | 1 | Mid-Qing |
| 64 | 05ET1K(12)_26 | 1 | 1 | Mid-Qing |
| 65 | 05ET1K(7)_27 | 1 | 1 | Mid-Qing |
| 66 | 05ET1K(7)_47 | 1 | 1 | Mid-Qing |
| 67 | 05ET1K(15)_8 | 2 | 2 | Mid-Qing |
| 68 | 05ET1K(15)_26 | 1 | 1 | Mid-Qing |
| 69 | 05ET1K(12)_15 | 2 | 1 | Mid-Qing |
| 70 | 05ET1K(14)_13 | 2 | 2 | Mid-Qing |
| 71 | 05ET1K(14)_37 | 2 | 2 | Mid-Qing |
| 72 | 05ET1K(14)_8 | 2 | 2 | Mid-Qing |
| 73 | 05ET1K(9)_16 | 1 | 1 | Mid-Qing |
| 74 | 05ET1K(9)_14 | 5 | 1 | Mid-Qing |
| 75 | 05ET1K(12)_23 | 5 | 2 | Mid-Qing |
| 76 | 05ET1K(7)_30 | 5 | 2 | Mid-Qing |
| 77 | 05ET1K(7)_46 | 1 | 1 | Mid-Qing |
| 78 | 05ET1K(7)_50 | 1 | 1 | Mid-Qing |
| 79 | 05ET1K(7)_47 | 2 | 2 | Mid-Qing |
| 80 | 05ET1K(13)_87 | 1 | 1 | Mid-Qing |
| 81 | 05ET1K(13)_71 | 1 | 4 | Mid-Qing |
| 82 | 06BG1K1(3)_138 | 4 | 2 | Mid-Qing |
| 83 | 06BG1K1(4)_89 | 5 | 1 | Mid-Qing |
| 84 | 06BG1K1(3)_678 | 1 | 1 | Mid-Qing |
| 85 | 06BG1K1(3)_185 | 1 | 2 | Mid-Qing |
| 86 | 06BG1K1(3)_768 | 1 | 1 | Mid-Qing |
| 87 | 06BG1K1(3) | 2 | 1 | Mid-Qing |
| 88 | 06BG1K1(3)_196 | 1 | 1 | Mid-Qing |
| 89 | 06BG1K1(3) | 1 | 3 | Mid-Qing |
| 90 | 06BG1K1(3)_679 | 1 | 1 | Mid-Qing |
| 91 | 06BG1K1(3)_223 | 2 | 1 | Mid-Qing |
| 92 | 06BG1K1(4)_66 | 1 | 1 | Mid-Qing |
| 93 | 06BG1K1(3)_304 | 2 | 1 | Mid-Qing |
| 94 | 06BG1K1(3)_774 | 5 | 2 | Mid-Qing |
| 95 | 06BG1K1(3)_315 | 1 | 2 | Mid-Qing |
| 96 | 06BG1K1(3)_824 | 3 | 1 | Mid-Qing |
| 97 | 06BG1K1(3)_1518 | 2 | 2 | Mid-Qing |
| 98 | 06BG1K1(3)_220 | 2 | 2 | Mid-Qing |
| 99 | 06BG1K1(3)_312 | 2 | 1 | Mid-Qing |
| 100 | 06BG1K1(3)_802 | 2 | 2 | Mid-Qing |
| 101 | 06BG1K1(3)_269 | 4 | 1 | Mid-Qing |
| 102 | 06BG1K1(4)_57 | 1 | 1 | Mid-Qing |
| 103 | 06BG1K1(3)_558 | 1 | 2 | Mid-Qing |
| 104 | 06BG1K2(3)_830 | 3 | 1 | Mid-Qing |
| 105 | 06ET1K2(5)_77 | 1 | 1 | Mid-Qing |
| 106 | 06ET1K2(5)_70 | 1 | 1 | Mid-Qing |
| 107 | 06ET1K2(9)_4 | 5 | 2 | Mid-Qing |
| 108 | 06ET1K2(3) | 5 | 1 | Mid-Qing |
| 109 | 06ET1K2(4)_12 | 2 | 3 | Mid-Qing |
| 110 | 06ET1K2(3)_401 | 1 | 2 | Mid-Qing |
| 111 | 06ET1K2(6)_312 | 3 | 3 | Mid-Qing |
| 112 | 06ET1K2(10)_35 | 5 | 2 | Mid-Qing |
| 113 | 06ET1K2(9)_61 | 2 | 2 | Mid-Qing |
| 114 | 06ET1K2(5)_122 | 5 | 2 | Mid-Qing |
| 115 | 06ET1K2(5)_116 | 1 | 2 | Mid-Qing |
| 116 | 06ET1K2(12)_15 | 5 | 2 | Mid-Qing |
| 117 | 05AG2(9)_24 | 1 | 2 | Mid-Qing |
| 118 | 05AG2(9)_46 | 1 | 2 | Mid-Qing |
| 119 | 05AG2(9)_44 | 1 | 3 | Mid-Qing |
| 120 | 05AG2(9)_129 | 2 | 1 | Mid-Qing |
| 121 | 05AG2(9)_53 | 2 | 2 | Mid-Qing |
| 122 | 05AG2(10)_49 | 2 | 2 | Mid-Qing |
| 123 | 05AG1Y3_1 | 1 | 3 | Mid-Qing |
| 124 | 05AG1Y3_24 | 1 | 1 | Mid-Qing |
| 125 | 05AG2(9)_166 | 2 | 2 | Mid-Qing |
| 126 | 05AG2(9)_85 | 1 | 3 | Mid-Qing |
| 127 | 05AG2(9)_56 | 5 | 3 | Mid-Qing |
| 128 | 05CT2(2)_2 | 4 | 1 | Late Qing - Republican |
| 129 | 05CT2(2)_40 | 4 | 2 | Late Qing - Republican |
| 130 | 05CT1(2)_64 | 1 | 2 | Late Qing - Republican |
| 131 | 05CT1(1)_48 | 1 | 1 | Late Qing - Republican |
| 132 | 05CT2(2)_13 | 1 | 2 | Late Qing - Republican |
| 133 | 05ET1(2)_151 | 3 | 2 | Late Qing - Republican |
| 134 | 05ET1(3)_226 | 2 | 2 | Late Qing - Republican |
| 135 | 05ET1K(3)_154 | 2 | 2 | Late Qing - Republican |
| 136 | 05ET1K(5)_3 | 2 | 3 | Late Qing - Republican |
| 137 | 05ET1K(5)_40 | 4 | 1 | Late Qing - Republican |
| 138 | 05ET1K(5)_7 | 1 | 4 | Late Qing - Republican |
| 139 | 05FT1(1)_7 | 2 | 1 | Late Qing - Republican |
| 140 | 05FT1(1)_12 | 1 | 1 | Late Qing - Republican |
| 141 | 05FT1(1)_4 | 2 | 1 | Late Qing - Republican |
| 142 | 06BG1K1(2)_306 | 4 | 2 | Late Qing - Republican |
| 143 | 06BG1K1(2)_5 | 2 | 1 | Late Qing - Republican |
| 144 | 05AG1(1)_44 | 1 | 2 | Late Qing - Republican |
| 145 | 05AG1(2)_34 | 1 | 2 | Late Qing - Republican |
| 146 | 05AG1(1)_54 | 1 | 3 | Late Qing - Republican |
| 147 | 05AG1Y2_6 | 2 | 2 | Late Qing - Republican |
| 148 | 05AG2(3)_24 | 1 | 1 | Late Qing - Republican |
| 149 | 05AG1Y2_8 | 1 | 1 | Late Qing - Republican |
| 150 | 05AG1Y2_10 | 2 | 3 | Late Qing - Republican |
| 151 | 05AG1Y2_15 | 1 | 2 | Late Qing - Republican |
| 152 | 05AG1(3)_23 | 5 | 2 | Late Qing - Republican |
| 153 | 05AG2(1)_8 | 2 | 1 | Late Qing - Republican |
| 154 | 05AG1(3)_41 | 1 | 3 | Late Qing - Republican |
| 155 | 05AG1(3)_30 | 1 | 3 | Late Qing - Republican |
| 156 | 05AG2(4)_105 | 1 | 1 | Late Qing - Republican |
| 157 | 05AG1(3)_42 | 6 | 1 | Late Qing - Republican |
| 158 | 05AG2(2)_8 | 6 | 1 | Late Qing - Republican |
| 159 | 05AG2(2)_26 | 2 | 3 | Late Qing - Republican |
| 160 | 05AG1(3)_12 | 5 | 2 | Late Qing - Republican |
| 161 | 05AG1(1)_33 | 2 | 3 | Late Qing - Republican |
| 162 | 05AG1(1)_65 | 5 | 2 | Late Qing - Republican |
| 163 | 05AG1(1)_55 | 5 | 2 | Late Qing - Republican |
| 164 | 05AG1(1)_5 | 5 | 3 | Late Qing - Republican |
| 165 | 05AG1(1)_41 | 6 | 2 | Late Qing - Republican |
| 166 | 05AG2(6)_13 | 2 | 2 | Late Qing - Republican |
| 167 | 05AG2(2)_130 | 5 | 1 | Late Qing - Republican |
| 168 | 05AG2(6)_66 | 4 | 1 | Late Qing - Republican |
| 169 | 05AG2(2)_39 | 4 | 2 | Late Qing - Republican |
| 170 | 05AG2(6)_38 | 4 | 1 | Late Qing - Republican |
| 171 | 05AG2(2)_37 | 2 | 3 | Late Qing - Republican |
| 172 | 05AG2(2)_123 | 3 | 2 | Late Qing - Republican |
| 173 | 05AG2(2)_17 | 2 | 2 | Late Qing - Republican |
| 174 | 05AG1(4)_28 | 2 | 2 | Late Qing - Republican |
| 175 | 05AG1(4)_12 | 1 | 1 | Late Qing - Republican |
| 176 | 05AG2(3)_27 | 4 | 3 | Late Qing - Republican |
| 177 | 05AG2(3)_28 | 5 | 2 | Late Qing - Republican |
| 178 | 05AG2(3)_2 | 4 | 3 | Late Qing - Republican |
| 179 | 05AG2(2)_44 | 5 | 3 | Late Qing - Republican |
| 180 | 05AG2(2)_137 | 5 | 2 | Late Qing - Republican |
| 181 | 05AG2(2)_91 | 1 | 2 | Late Qing - Republican |
| 182 | 05AG2(2)_22 | 6 | 1 | Late Qing - Republican |
| 183 | 05AG2(2)_100 | 6 | 1 | Late Qing - Republican |
| 184 | 05AG2(2)_199 | 5 | 2 | Late Qing - Republican |
| 185 | 05AG2(4)_49 | 1 | 1 | Late Qing - Republican |
| 186 | 05AG2(4)_43 | 5 | 2 | Late Qing - Republican |
| 187 | 05AG1(1)_62 | 5 | 1 | Late Qing - Republican |

## Appendix 2: SEM EDS chemical composition of Shushan samples

| **Time period** | **Sample number** | **Average chemical composition of three SEM-EDS detected areas on Shushan samples** | | | | | | | | | | |
| --- | --- | --- | --- | --- | --- | --- | --- | --- | --- | --- | --- | --- |
| **Na** | **Mg** | **Al** | **Si** | **K** | **Ca** | **Ti** | **Cr** | **Mn** | **Fe** | **Total** |
| Ming | 05BG1(4)_63 | 0.07 | 0.44 | 19.07 | 70.93 | 2.09 | 0.24 | 0.98 | 0.00 | 0.00 | 6.16 | 100.00 |
| 06BG1K1(5)_130 | 0.00 | 0.45 | 16.89 | 74.12 | 2.06 | 0.38 | 1.07 | 0.00 | 0.00 | 5.03 | 100.00 |
| 05BG1(4)_18 | 0.11 | 0.42 | 20.23 | 69.75 | 2.26 | 0.21 | 1.10 | 0.00 | 0.00 | 5.92 | 100.00 |
| 05BG1K1(5)_5 | 0.24 | 0.63 | 17.77 | 70.90 | 2.13 | 0.28 | 1.19 | 0.00 | 0.00 | 6.87 | 100.00 |
| Early Qing | 06ET1Y1(1)_19 | 0.29 | 0.43 | 15.18 | 75.67 | 1.52 | 0.40 | 0.91 | 0.00 | 0.00 | 5.60 | 100.00 |
| 06ET1K2(6)_312 | 0.35 | 0.81 | 20.18 | 68.85 | 2.21 | 0.47 | 0.93 | 0.00 | 0.00 | 6.20 | 100.00 |
| 06ET1Y1(1)_1 | 0.07 | 0.51 | 23.18 | 67.14 | 1.87 | 0.46 | 0.93 | 0.00 | 0.00 | 5.83 | 100.00 |
| 06ET1K(17)_55 | 0.31 | 0.52 | 16.21 | 74.04 | 1.87 | 0.34 | 1.05 | 0.00 | 0.00 | 5.68 | 100.00 |
| 06ET1K2(14)_24 | 0.18 | 0.79 | 21.93 | 65.66 | 2.75 | 0.38 | 0.97 | 0.00 | 0.00 | 7.33 | 100.00 |
| Mid-Qing | 05BG1(3)_134 | 0.24 | 0.71 | 24.96 | 64.56 | 5.45 | 0.26 | 1.12 | 0.00 | 0.00 | 2.69 | 100.00 |
| 06BG1K1(3)_223 | 0.55 | 0.77 | 16.08 | 73.19 | 1.79 | 0.56 | 0.89 | 0.00 | 0.00 | 6.17 | 100.00 |
| 06BG1K2(3)_269 | 0.00 | 0.45 | 23.68 | 64.11 | 2.45 | 0.28 | 1.18 | 0.00 | 0.00 | 7.85 | 100.00 |
| 05BG1(3)_98 | 0.45 | 0.73 | 16.57 | 73.66 | 2.17 | 0.49 | 0.89 | 0.00 | 0.00 | 5.04 | 100.00 |
| 05ET1K(10)_18 | 0.18 | 0.48 | 15.79 | 73.80 | 1.57 | 0.31 | 1.01 | 0.00 | 0.00 | 6.87 | 100.00 |
| 05AG2(9)_56 | 0.14 | 0.52 | 18.11 | 72.19 | 1.95 | 0.36 | 0.91 | 0.00 | 0.00 | 5.82 | 100.00 |
| Late Qing–Republican period | 05AG2(2)_17 | 0.00 | 0.52 | 25.00 | 63.27 | 2.29 | 0.26 | 1.07 | 0.00 | 0.00 | 7.59 | 100.00 |
| 05AG1(1)_55 | 0.00 | 0.44 | 19.22 | 70.43 | 2.10 | 0.19 | 0.99 | 0.00 | 0.00 | 6.65 | 100.00 |
| 05AG1(3)_42 | 0.82 | 0.77 | 17.17 | 70.69 | 2.16 | 0.81 | 0.87 | 0.00 | 0.00 | 6.72 | 100.00 |
| 05ET1(1)_12 | 0.00 | 0.39 | 16.99 | 74.02 | 1.67 | 0.21 | 0.91 | 0.00 | 0.00 | 5.81 | 100.00 |
| 05AG2(2)_39 | 0.04 | 0.40 | 19.54 | 69.71 | 1.91 | 0.18 | 1.09 | 0.00 | 0.00 | 7.13 | 100.00 |
| 05AG2(2)_123 | 0.17 | 0.44 | 22.46 | 70.36 | 3.23 | 0.19 | 1.06 | 0.00 | 0.00 | 2.10 | 100.00 |

## Appendix 3: Microscopic photos for five representative coarseness groups of Shushan site *zisha* samples

| **Sample No.** | **Excavation No.** | **Coarseness group**  **in optical analysis and in SEM and ImageJ analysis** | **Microscopic image of representative sample** |
| --- | --- | --- | --- |
| 1 | 06ET1K2(17)_99 | Optical analysis: Fine clay group  SEM and ImageJ analysis: Fine clay group | 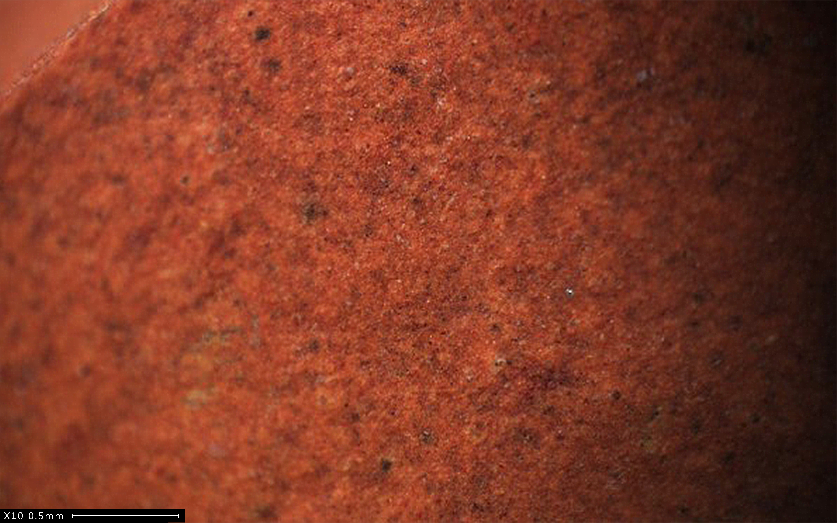 |
| 2 | 05BG1(3)_133 | Optical analysis: Fine to medium clay group  SEM and ImageJ analysis: Fine clay group | 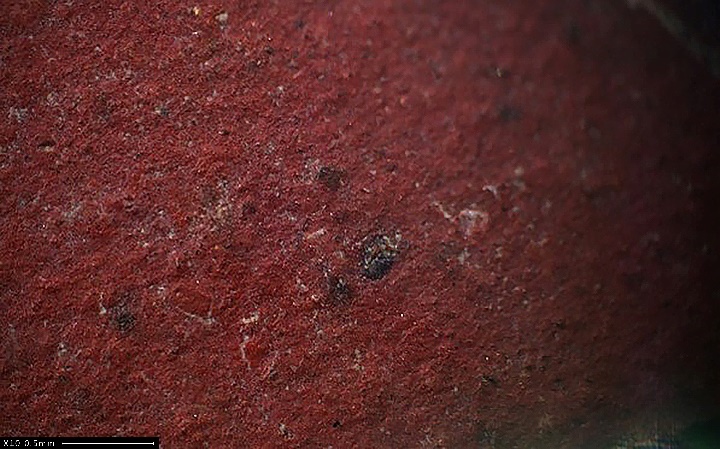 |
| 3 | 05AG1(1)_54 | Optical analysis: Medium clay group  SEM and ImageJ analysis: Medium clay group | 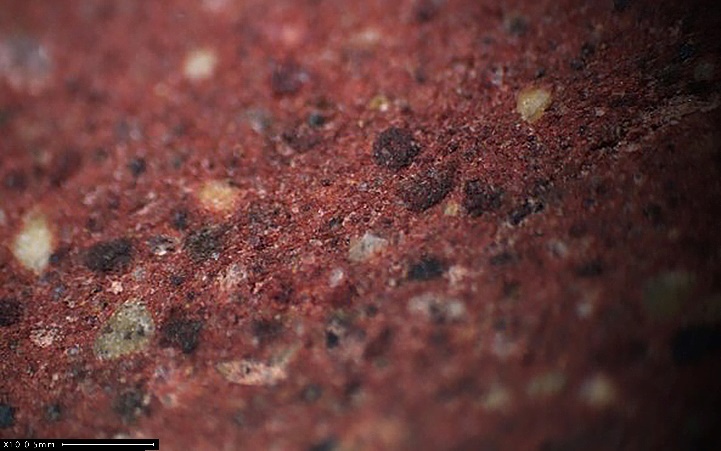 |
| 4 | 05BG1(4)_48 | Optical analysis: Medium to coarse clay group  SEM and ImageJ analysis: Medium clay group | 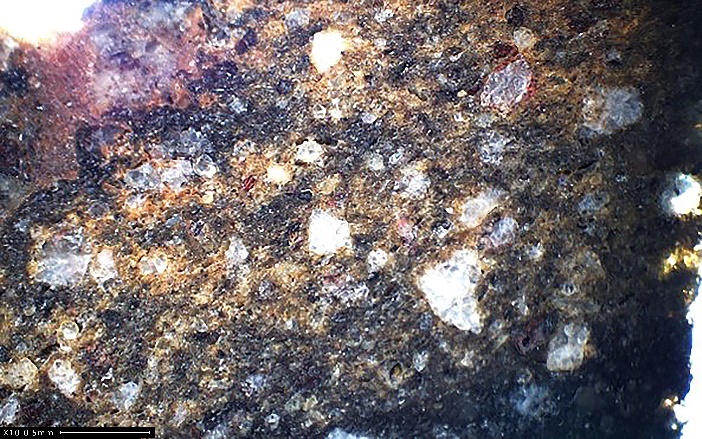 |
| 5 | 05BG1(4)_84 | Optical analysis: Coarse clay group  SEM and ImageJ analysis: Coarse clay group | 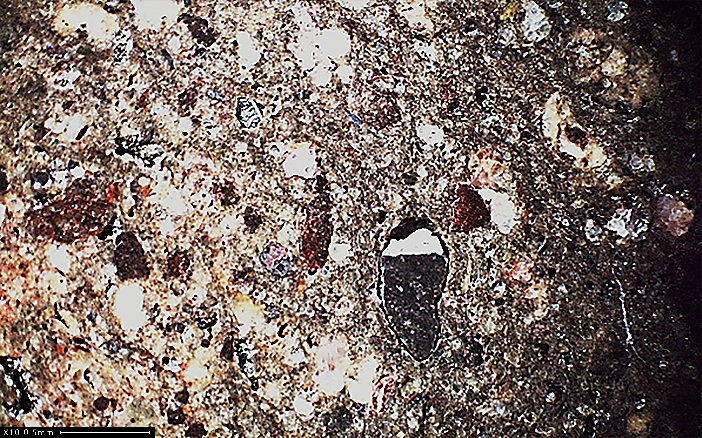 |

## Appendix 4: *Zisha* clay quartz particle area calculated using SEM EDS and ImageJ on Shushan samples. The SEM-EDS silicon distribution map was generated by HITACHI TM 4000 Plus in the Oxford Research Laboratory for Archaeology and the History of Art (RLAHA) using 20kV vacuum mode 3. The input count was 16000-25000 cps. The particle area was calculated using the following method: 1. sum up all particle areas of each mapping image (each piece has three silicon distribution SEM mapping areas); 2. calculate average number of sum up particle areas of three mapping areas.

| **Dated period** | **Sample No.** | **Excavation No.** | **Total particle area** | **Coarse clay group** |
| --- | --- | --- | --- | --- |
| Ming | 1 | 05BG1(4)_102 | 50537.25433 | Fine clay group |
| 2 | 06BG1K1(5)_40 | 60273.31633 | Fine clay group |
| 3 | 05BG1(4)_18 | 53507.54367 | Medium clay group |
| 4 | 05BG1(4)_48 | 80911.45267 | Medium clay group |
| 5 | 05BG1(4)_7 | 55303.90033 | Coarse clay group |
| 6 | 05BG1(4)_84 | 63548.62067 | Coarse clay group |
| Early Qing | 7 | 06ET1K2(12)_23 | 51587.597 | Fine clay group |
| 8 | 06ET1K2(14)_141 | 50029.12433 | Fine clay group |
| 9 | 06ETK(17)_55 | 49056.241 | Medium clay group |
| 10 | 06ET1Y1(1)_1 | 47896.08 | Medium clay group |
| Mid-Qing | 11 | 06BG1K1(3)_196 | 35922.31767 | Fine clay group |
| 12 | 06BG1K1(3)_223 | 33353.094 | Fine clay group |
| 13 | 05AG2(9)_56 | 41925.207 | Medium clay group |
| 14 | 05AG2(9)_85 | 39679.58867 | Medium clay group |
| Late Qing | 15 | 05AG1(3)_42 | 33292.50733 | Fine clay group |
| 16 | 05AG2(2)_17 | 33844.011 | Fine clay group |
| 17 | 05AG1(3)_30 | 26311.913 | Medium clay group |
| 18 | 05ET1K(5)_7 | 34275.02667 | Medium clay group |

## Appendix 5: Area of individual quartz inclusions on Shushan *zisha* samples calculated using SEM EDS and ImageJ. This SEM-EDS silicon distribution map was generated by HITACHI TM 4000 Plus at the Oxford Research Laboratory for Archaeology and the History of Art (RLAHA) using 20kV vacuum mode 3. The input count was 16000-25000 cps. The average particle size was calculated: 1. calculate average particle size of each mapping area (each piece has three silicon distribution SEM mapping areas); 2. average calculation of three mapping area average particle size.

| **Dated period** | **Sample No.** | **Excavation No.** | **Average particle size** | **Coarse clay group** |
| --- | --- | --- | --- | --- |
| Ming | 1 | 05BG1(4)_102 | 110.64 | Fine clay group |
| 2 | 06BG1K1(5)_40 | 129.85 | Fine clay group |
| 3 | 05BG1(4)_18 | 287.95 | Medium clay group |
| 4 | 05BG1(4)_48 | 296.63 | Medium clay group |
| 5 | 05BG1(4)_7 | 157.24 | Coarse clay group |
| 6 | 05BG1(4)_84 | 183.46 | Coarse clay group |
| Early Qing | 7 | 06ET1K2(12)_23 | 200.15 | Fine clay group |
| 8 | 06ET1K2(14)_141 | 298.44 | Fine clay group |
| 9 | 06ETK(17)_55 | 210.43 | Medium clay group |
| 10 | 06ET1Y1(1)_1 | 222.29 | Medium clay group |
| Mid-Qing | 11 | 06BG1K1(3)_196 | 82.73 | Fine clay group |
| 12 | 06BG1K1(3)_223 | 72.71 | Fine clay group |
| 13 | 05AG2(9)_56 | 120.66 | Medium clay group |
| 14 | 05AG2(9)_85 | 124.79 | Medium clay group |
| Late Qing | 15 | 05AG1(3)_42 | 69.64 | Fine clay group |
| 16 | 05AG2(2)_17 | 115.71 | Fine clay group |
| 17 | 05AG1(3)_30 | 103.38 | Medium clay group |
| 18 | 05ET1K(5)_7 | 88.58 | Medium clay group |

## Appendix 6: *Zisha* clay quartz particle size deviation of Shushan samples calculated by SEM EDS and ImageJ. This SEM-EDS silicon distribution map was generated by HITACHI TM 4000 Plus at the Oxford Research Laboratory for Archaeology and the History of Art (RLAHA) using 20kV vacuum mode 3; the input count is 16000-25000 cps. The average particle size deviation was calculated: 1. Calculate particle size standard deviation of each mapping area (each piece has three silicon distribution SEM mapping areas); 2. average calculation of three mapping area standard deviation.

| **Dated period** | **Sample No.** | **Excavation  No.** | **Average particle size standard deviation** | **Coarseness group in SEM analysis** |
| --- | --- | --- | --- | --- |
| Ming | 1 | 05BG1(4)_102 | 630.22 | Fine clay group |
| 2 | 06BG1K1(5)_40 | 354.87 | Fine clay group |
| 3 | 05BG1(4)_18 | 1665.07 | Medium clay group |
| 4 | 05BG1(4)_48 | 1918.68 | Medium clay group |
| 5 | 05BG1(4)_7 | 691.25 | Coarse clay group |
| 6 | 05BG1(4)_84 | 866.61 | Coarse clay group |
| Early Qing | 7 | 06ET1K2(12)_23 | 489.39 | Fine clay group |
| 8 | 06ET1K2(14)_141 | 711.43 | Fine clay group |
| 9 | 06ETK(17)_55 | 1025.49 | Medium clay group |
| 10 | 06ET1Y1(1)_1 | 579.62 | Medium clay group |
| Mid-Qing | 11 | 06BG1K1(3)_196 | 164.19 | Fine clay group |
| 12 | 06BG1K1(3)_223 | 412.54 | Fine clay group |
| 13 | 05AG2(9)_56 | 398.45 | Medium clay group |
| 14 | 05AG2(9)_85 | 195.35 | Medium clay group |
| Late Qing | 15 | 05AG1(3)_42 | 109.2 | Fine clay group |
| 16 | 05AG2(2)_17 | 342.47 | Fine clay group |
| 17 | 05AG1(3)_30 | 607.75 | Medium clay group |
| 18 | 05ET1K(5)_7 | 415.35 | Medium clay group |
